# Supplementary material for: A dynamic power-law sexual network model of gonorrhoea outbreaks
Source: PubMed Central journal article supplement (PMC6426262; doi:10.1371/journal.pcbi.1006748), 2019-03-08

$\gamma = 1.4; k_0 = 0.4; p(k=0) = 0.16$

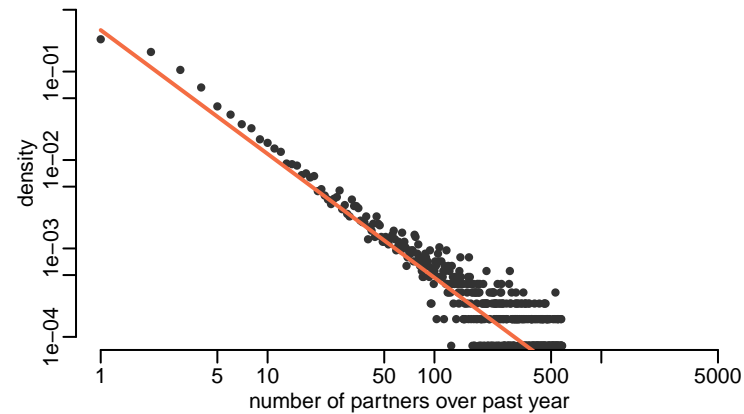

$\gamma = 1.6; k_0 = 0.4; p(k=0) = 0.21$

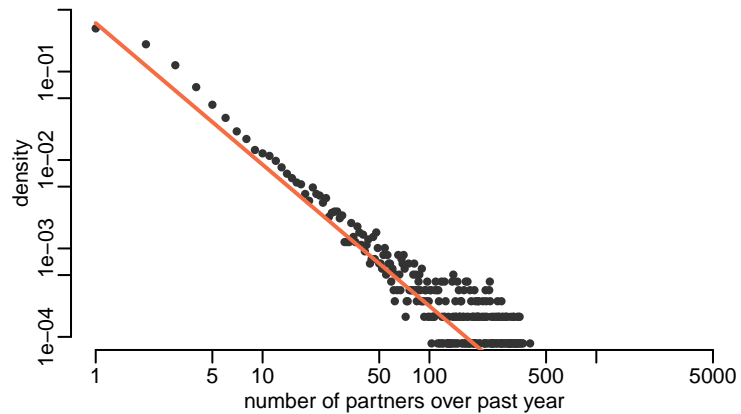

$\gamma = 1.8; k_0 = 0.4; p(k=0) = 0.27$

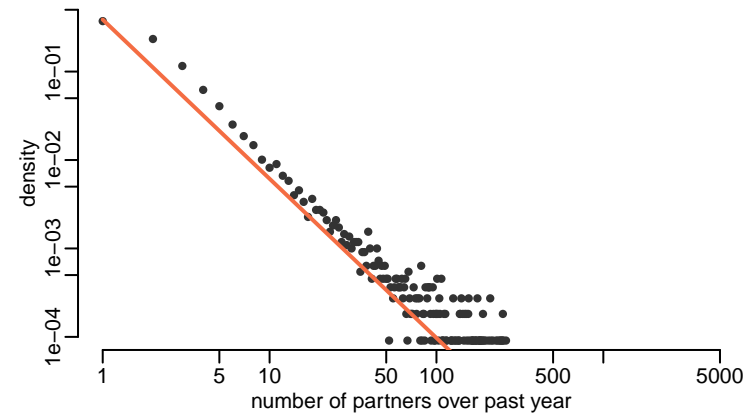

$\gamma = 1.4; k_0 = 0.5; p(k=0) = 0.14$

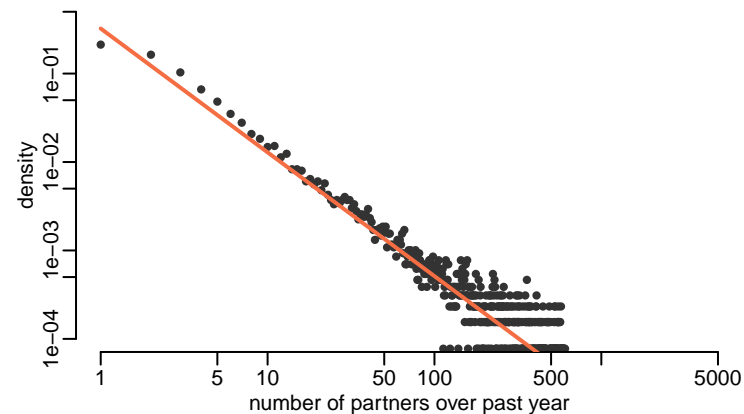

$\gamma = 1.6; k_0 = 0.5; p(k=0) = 0.18$

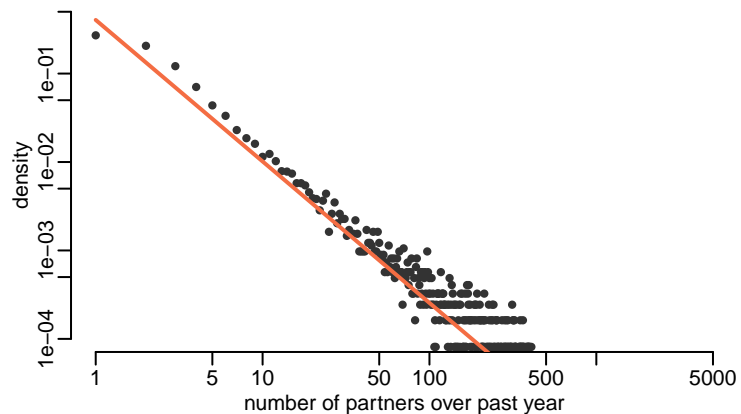

$\gamma = 1.8; k_0 = 0.5; p(k=0) = 0.23$

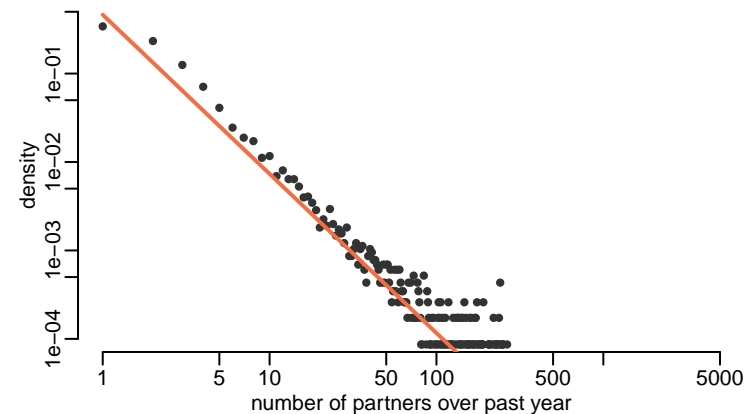

$\gamma = 1.4; k_0 = 0.6; p(k=0) = 0.11$

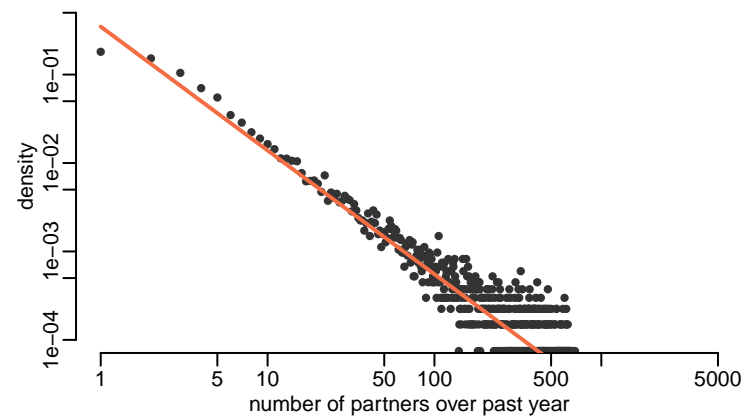

$\gamma = 1.6; k_0 = 0.6; p(k=0) = 0.15$

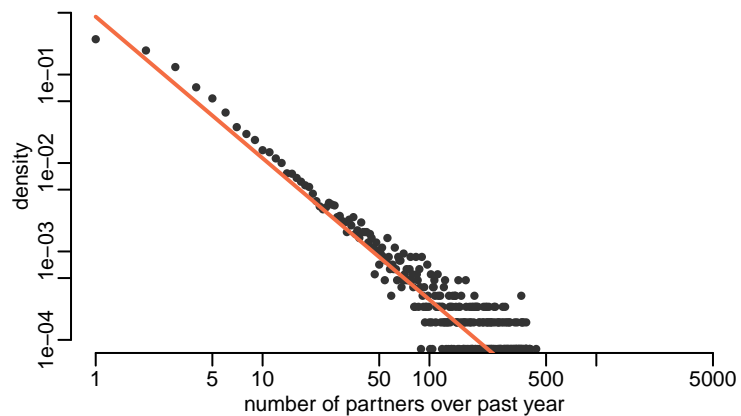

$\gamma = 1.8; k_0 = 0.6; p(k=0) = 0.2$

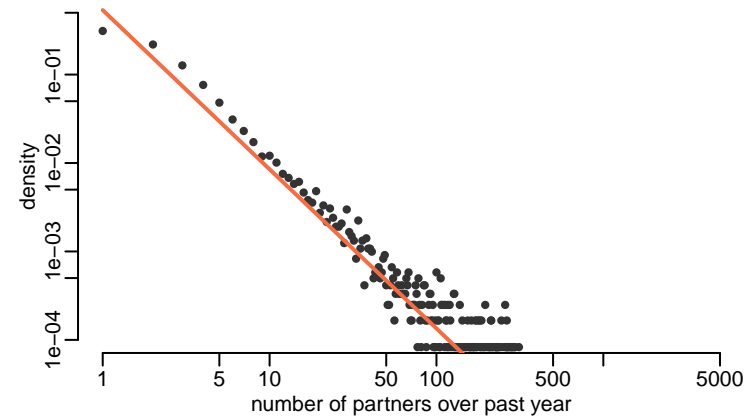

Supplement: pcbi.1006748.s001.pdf [file pcbi.1006748.s001.pdf]
