# Supplementary material for: A dynamic power-law sexual network model of gonorrhoea outbreaks
Source: PubMed Central journal article supplement (PMC6426262; doi:10.1371/journal.pcbi.1006748), 2019-03-08
Supplement: pcbi.1006748.s002.pdf [file pcbi.1006748.s002.pdf]

density

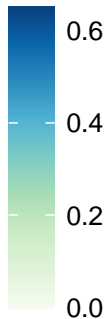

number of siblings

9  
8  
7  
6  
5  
4  
3  
2  
1  
0

0

1

2

3

4

5

6

7

8

9

number of offspring
