# Supplementary material for: A dynamic power-law sexual network model of gonorrhoea outbreaks
Source: PubMed Central journal article supplement (PMC6426262; doi:10.1371/journal.pcbi.1006748), 2019-03-08

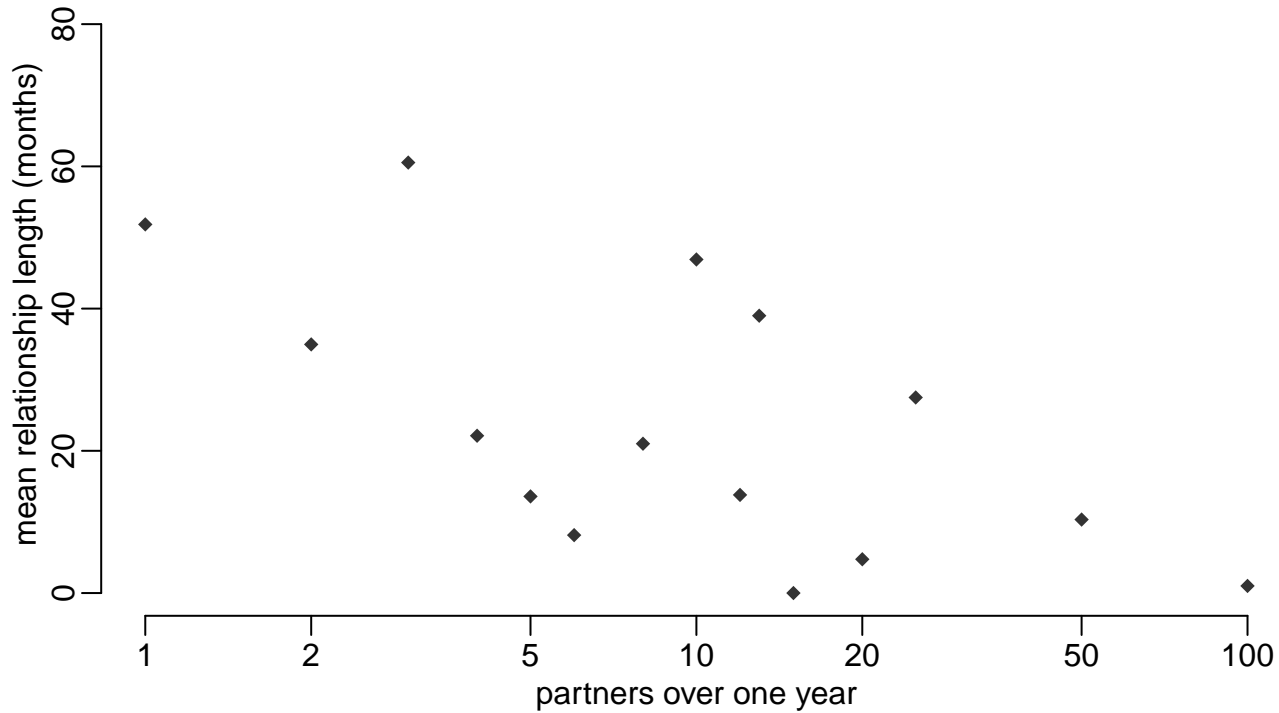

Supplement: pcbi.1006748.s003.pdf [file pcbi.1006748.s003.pdf]
