# Supplementary material for: A dynamic power-law sexual network model of gonorrhoea outbreaks
Source: PubMed Central journal article supplement (PMC6426262; doi:10.1371/journal.pcbi.1006748), 2019-03-08
Supplement: pcbi.1006748.s005.pdf [file pcbi.1006748.s005.pdf]

## S2 Appendix: Simulation of dynamic network

We can simulate the dynamic network of partnerships using the following algorithm, which takes as inputs: the size of the network  $N$ , the distribution of  $\lambda$ ,  $f(\lambda)$ , the desired power-law coefficient  $\gamma$  and  $k_0 = \lim_{\lambda \rightarrow 0} \kappa(\lambda)$ .

1. choose  $k_\infty$  to be as large as possible, subject to the condition that  $g(\infty) \leq 1$
2. draw  $\lambda_1, \dots, \lambda_N$  from  $f(\lambda)$
3. simulate partnerships in network at time  $t = 0$ , where  $\mathbb{P}(\{j, l\} \in \mathcal{P}(0)) = q_0(\lambda_j, \lambda_l) = 1 - \frac{1}{1 + \frac{1}{\phi}}$
4. calculate  $g(\lambda)$
5. generate an  $N \times N$  matrix of the rates of partnership formation that each possible set of partners  $A$ , where:

$$A_{j,l} = \min \left\{ -\ln \left( \left( 1 - g(\lambda_j)g(\lambda_l) \right) \left( 1 + \frac{1}{\phi} \right) \right), \frac{1}{50\phi} \right\}$$

6. set  $A_{j,j} := 0$  for all  $j = 1, \dots, N$
7. determine initial event rates  $\hat{R}_a(0), R_d(0)$  (note that  $\hat{R}_a(t) \geq R_a(t)$  as rejection sampling is used)

- rate of adding partnerships  $\hat{R}_a(t) = \sum_{j=1}^N \sum_{l=j+1}^N a(\lambda_j, \lambda_l)$  (time invariant)
- rate of deleting partnerships  $R_d(0) = \sum_{j,l \in \mathcal{P}(0)} d(\lambda_j, \lambda_l)$

8. While  $t < T$  where initially  $t = 0$ :

- (a) Generate a time,  $\tau \sim \text{Exp}(\hat{R}(t))$  after which the next event,  $e$  takes place;
- (b) update the time

$$t := t + \tau$$

- (c) Determine which event took place by sampling  $e \in \{a, d\}$  where

$$\mathbb{P}[e] = \frac{\hat{R}_e(t - \tau)}{\hat{R}(t - \tau)}$$

- if the event sampled is a partnership formation ( $e = a$ ):
  - i. propose two individuals  $\{j, l\}$  from the population with probability  $\frac{a(\lambda_j, \lambda_l)}{\hat{R}_a(t - \tau)}$ .
  - ii. check the partnership does not already exist, if  $\{j, l\} \in \mathcal{P}(t - \tau)$  reject an move on to next step;
  - iii. else, accept and update the state of the model

$$\mathcal{P}(t) := \mathcal{P}(t - \tau) \cup \{j, l\}$$

$$N_P(t) := N_P(t - \tau) + 1$$

- iv. increase rate of partnership breakups

$$R_d(t) := R_d(t - \tau) + d(\lambda_j, \lambda_l)$$

- if the event sampled is a partnership breakup ( $e = d$ ):
  - i. sample a partnership to breakup  $\{j, l\}$  from the current couples  $\mathcal{P}(t - \tau)$  with probability  $\frac{d(\lambda_j, \lambda_l)}{R_d(t - \tau)}$

ii. update the state of the model

$$\mathcal{P}(t) := \mathcal{P}(t - \tau) \setminus \{j, l\}$$

$$N_P(t) := N_P(t - \tau) - 1$$

iii. decrease rate of partnership breakups

$$R_d(t) := R_d(t - \tau) - d(\lambda_j, \lambda_l)$$

(d) next step

9. return the states of the model  $\mathcal{P}(t)$  for all sampled times  $t$

At any given time we have

- $\hat{R}_a(t) = \sum_{j=1}^N \sum_{l=j+1}^N a(\lambda_j, \lambda_l)$ ;
- $R_d(t) = \sum_{\{j,l\} \in \mathcal{P}(t-\tau)} d(\lambda_j, \lambda_l)$ ;
